# Supplementary material
Source: PubMed Central journal article supplement (PMC11028839)
Supplement: 262_2014_1630_MOESM1_ESM.pdf [file 262_2014_1630_MOESM1_ESM.pdf]

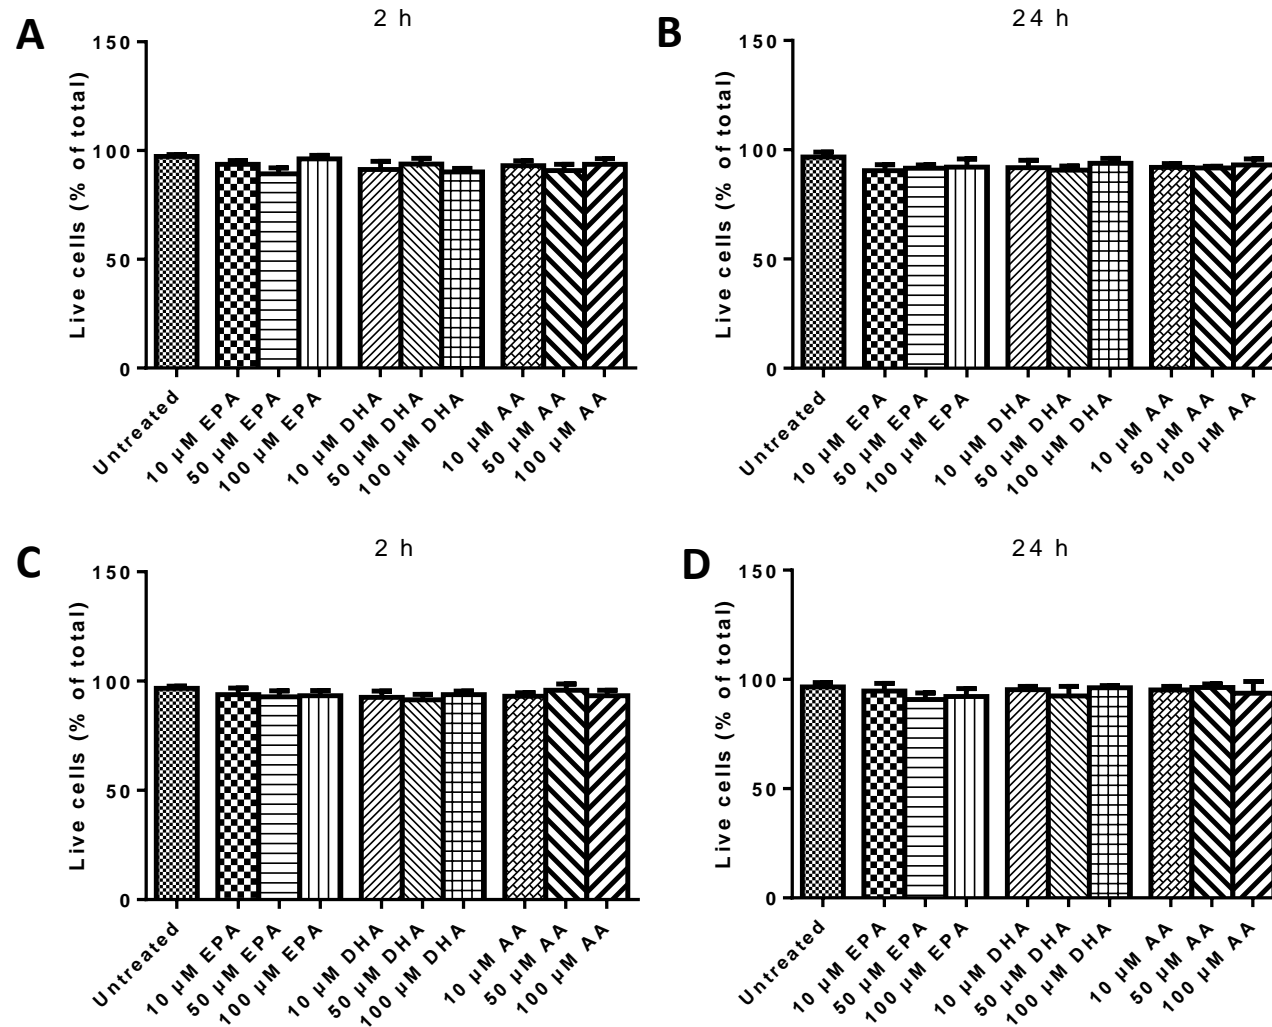

**supplementary Figure 1** PUFA supplementation does not influence DU-145 and PC-3 cell viability. DU-145 (**A and B**) and PC-3 (**C and D**) cell viability was determined using trypan blue after treating cells with indicated concentrations of EPA-Na, DHA-Na and AA-Na for 2 h and 24 h.
